# Supplementary material
Source: Springer Nature journal article supplement (https://www.springermedizin.de/resource/supplementary/12987_2012_72_MOESM4_ESM.pdf/9680276)

## KC

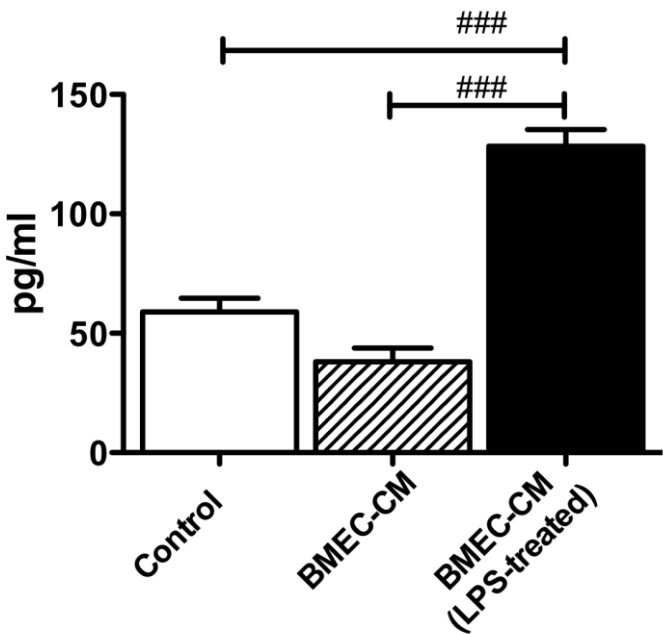

## MCP-1

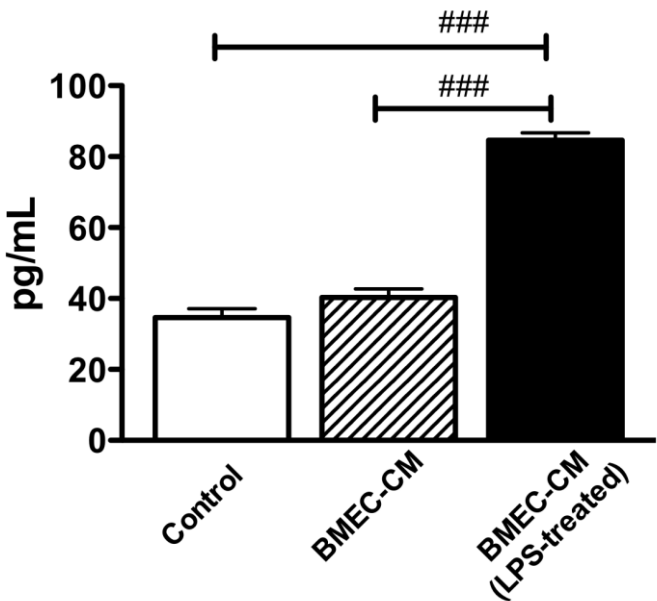

Supplement: MOESM4 [file 9680276]
